# Supplementary material for: Zn2+ and Cu2+ Interaction with the Recognition Interface of ACE2 for SARS-CoV-2 Spike Protein
Source: MDPI journal article supplement (doi:10.3390/ijms24119202), 2023-05-24
Supplement: s1 [file s1]

# Zn<sup>2+</sup> and Cu<sup>2+</sup> Interaction with the Recognition Interface of ACE2 for SARS-CoV-2 Spike Protein

Alessio Pelucelli <sup>1</sup>, Massimiliano Peana <sup>1,\*</sup>, Bartosz Orzeł <sup>2</sup>, Karolina Piasta <sup>2</sup>,  
Elzbieta Gumienna-Kontecka <sup>2</sup>, Serenella Medici <sup>1</sup> and Maria Antonietta Zoroddu <sup>1</sup>

<sup>1</sup> Department of Chemical, Physical, Mathematical and Natural Sciences, University of Sassari, 07100 Sassari, Italy; alessiopelucelli@gmail.com (A.P.); sere@uniss.it (S.M.); zoroddu@uniss.it (M.A.Z.)

<sup>2</sup> Faculty of Chemistry, University of Wroclaw, 50-383 Wroclaw, Poland; bartosz.orzel@chem.uni.wroc.pl (B.O.); elzbieta.gumienna-kontecka@chem.uni.wroc.pl (E.G.-K.)

\* Correspondence: peana@uniss.it

## Supplementary Materials

**Table S1.** Hydrolysis constants for Cu(II) and Zn(II) ions for 0.1M ionic strength, T= 25°C.

| Species                            | log $\beta$ |
|------------------------------------|-------------|
| Cu(OH) <sup>+</sup>                | -7.86       |
| Cu(OH) <sub>2</sub>                | -16.47      |
| Cu(OH <sub>3</sub> ) <sup>-</sup>  | -26.65      |
| Cu(OH <sub>4</sub> ) <sup>2-</sup> | -39.29      |
| Zn(OH) <sup>+</sup>                | -9.12       |
| Zn(OH) <sub>2</sub>                | -18.08      |
| Zn(OH <sub>3</sub> ) <sup>-</sup>  | -27.97      |
| Zn(OH <sub>4</sub> ) <sup>2-</sup> | -39.50      |

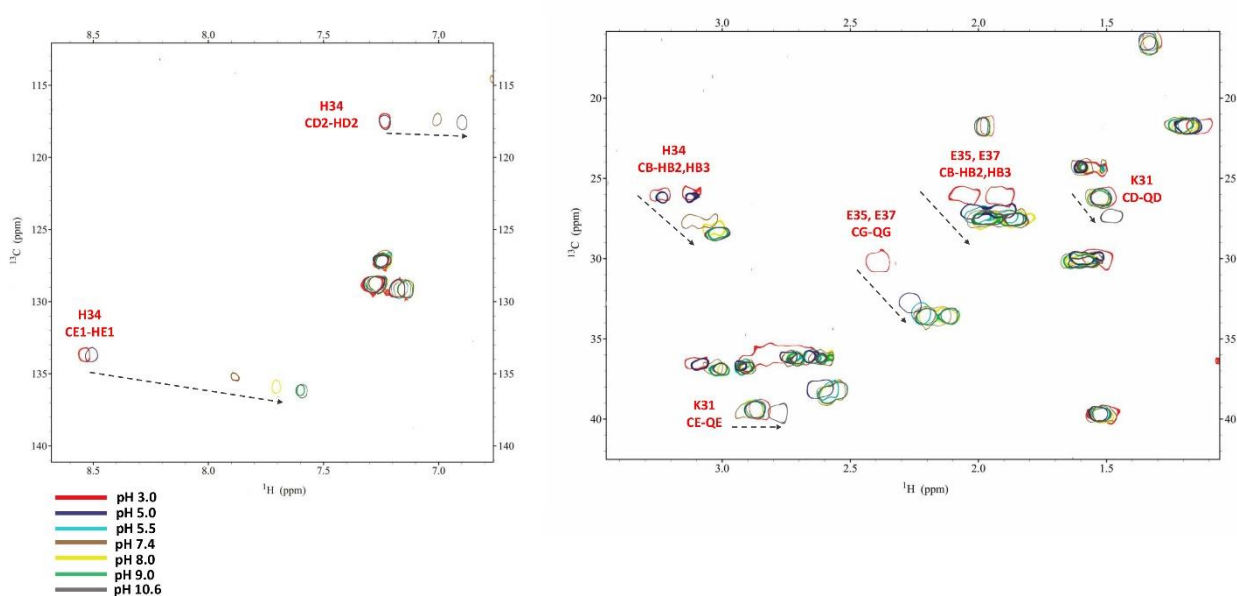

**Figure S1.** Superimposition of selected region of the <sup>1</sup>H-<sup>13</sup>C HSQC spectra for the free peptide P29-38 at various pH values.

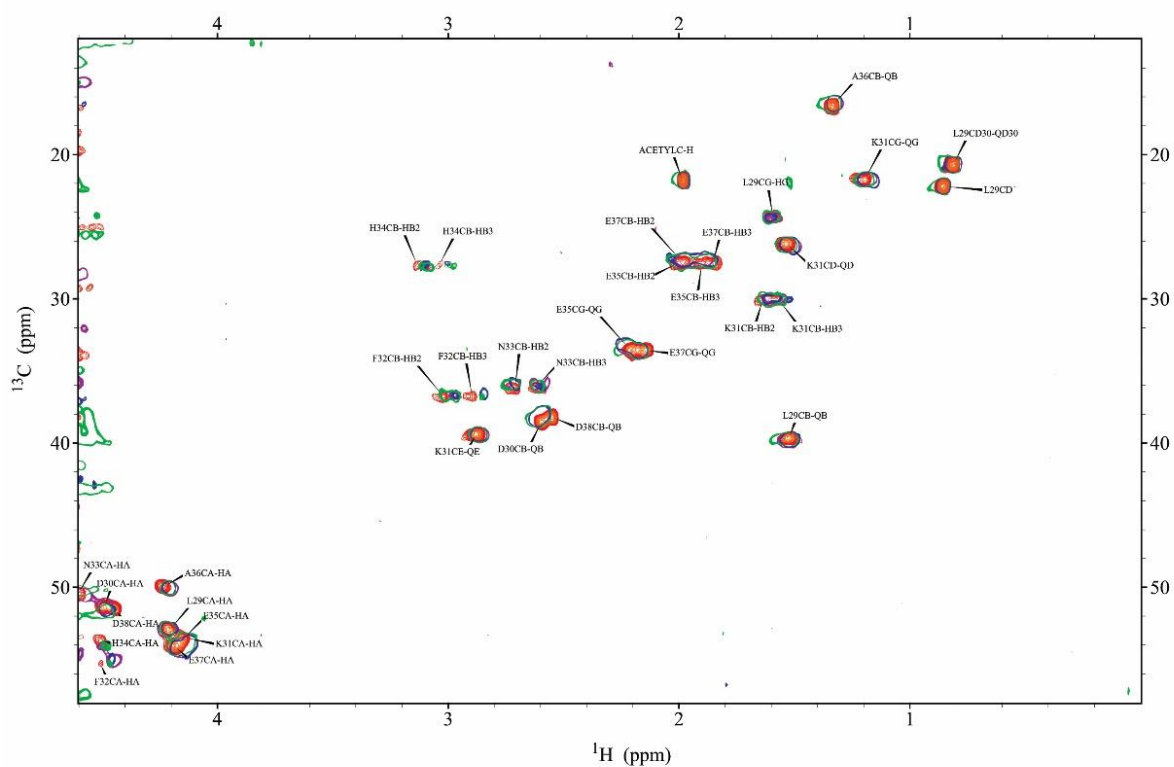

**Figure S2.** Superimposition of the aliphatic region of the  $^1\text{H}$ - $^{13}\text{C}$  HSQC spectra for the free peptide P29-38 at pH 8 (orange) and the Zn(II)-P29-38 system at pH 8 (blue contours) and pH 9 (green contours).

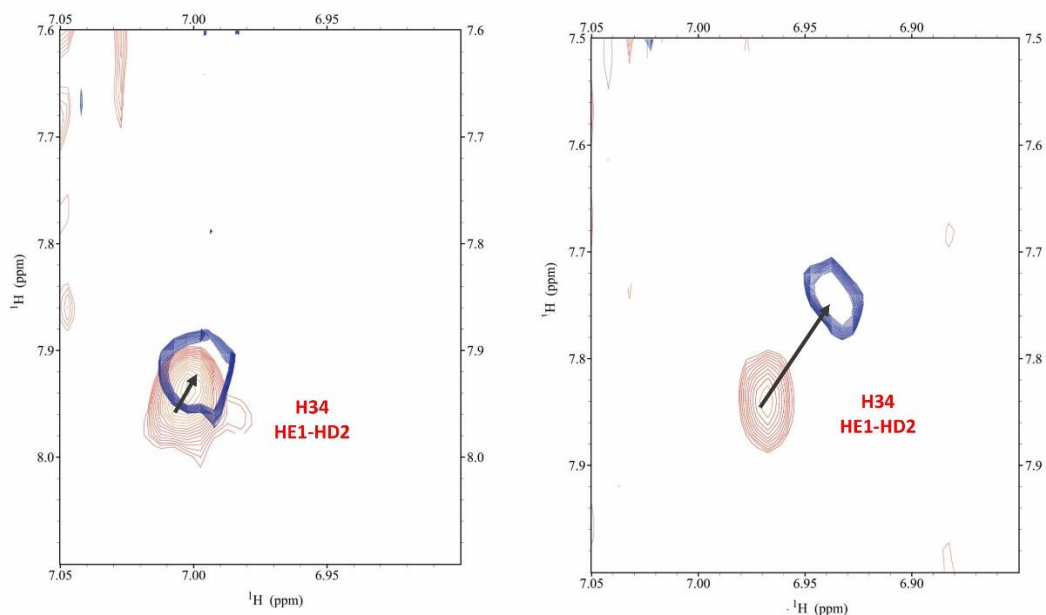

**Figure S3.** Superimposition of the selected region of the  $^1\text{H}$ - $^1\text{H}$  TOCSY spectra for the free peptide P23-42 (orange) and the Zn(II)-P29-38 system (blue contours) at pH 7 (left) and pH 7.5 (right), related to the correlation signals of aromatic protons HE1 and HD2 of His34.

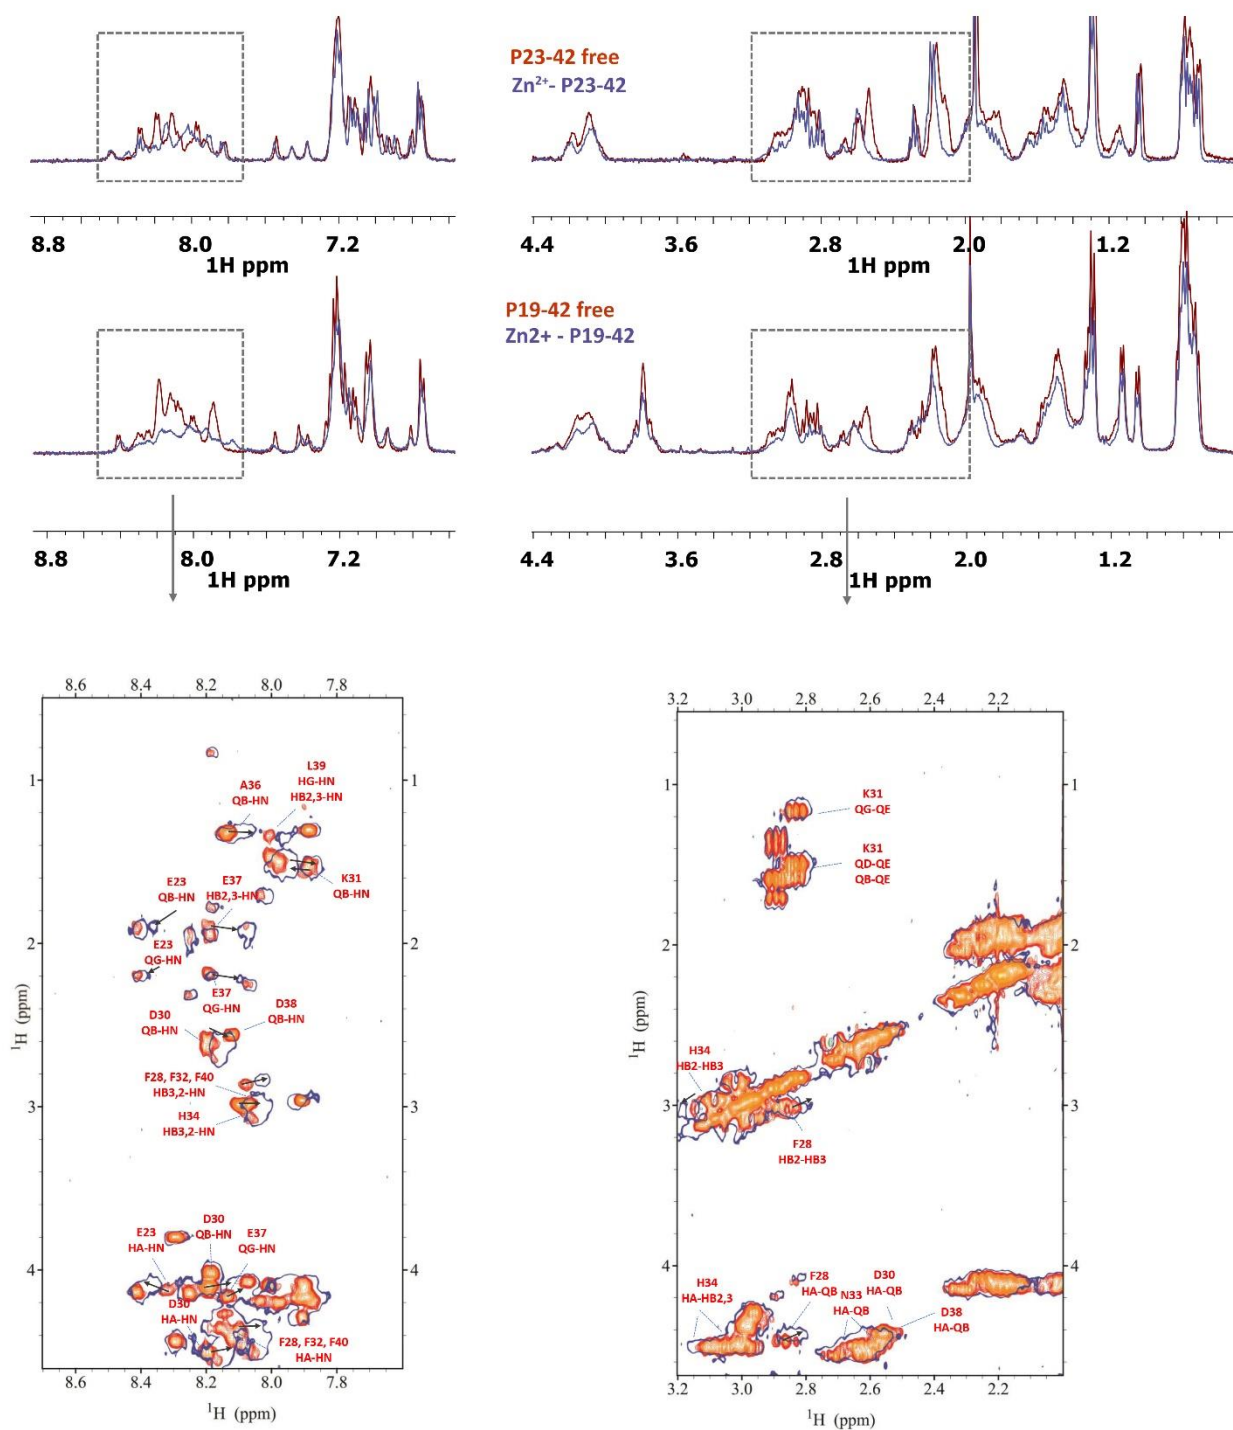

**Figure S4.** (up) Comparison of  $^1\text{H}$  spectra for the free peptide P23-42 (orange) and Zn(II)-P23-42 system (blue) and P19-42 (orange) and Zn(II)-P19-42 system (blue) at pH 7.0; (down) selection of  $^1\text{H}$ - $^1\text{H}$  TOCSY spectra for the free peptide P19-42 (orange) and Zn(II)-P19-42 system (blue) at pH 7.0.

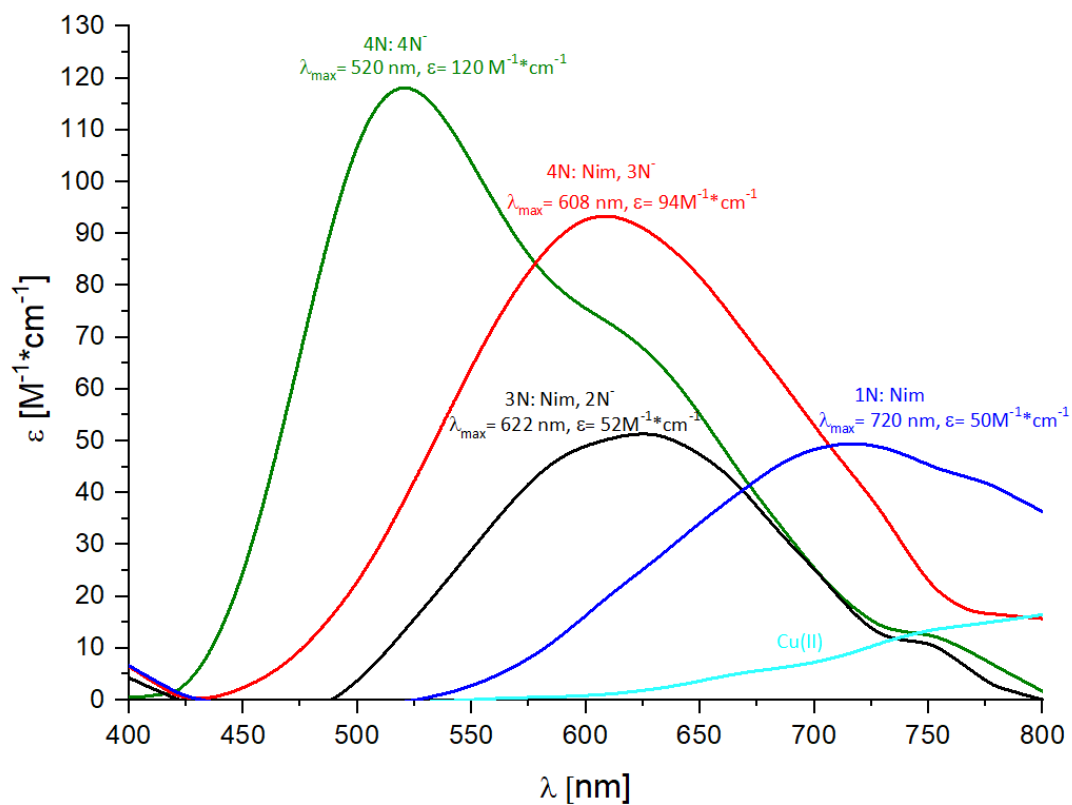

**Figure S5.** Calculated UV-Vis bands for various Cu(II) complex forms. Bands calculated and drawn by SPECFIT/32 software. cyano: free Cu(II), blue:  $[\text{CuHL}]^-$ , black:  $[\text{CuLH}_2]^{3-}$ , red:  $[\text{CuLH}_2]^{4-}$ , green:  $[\text{CuLH}_3]^{5-}$ .

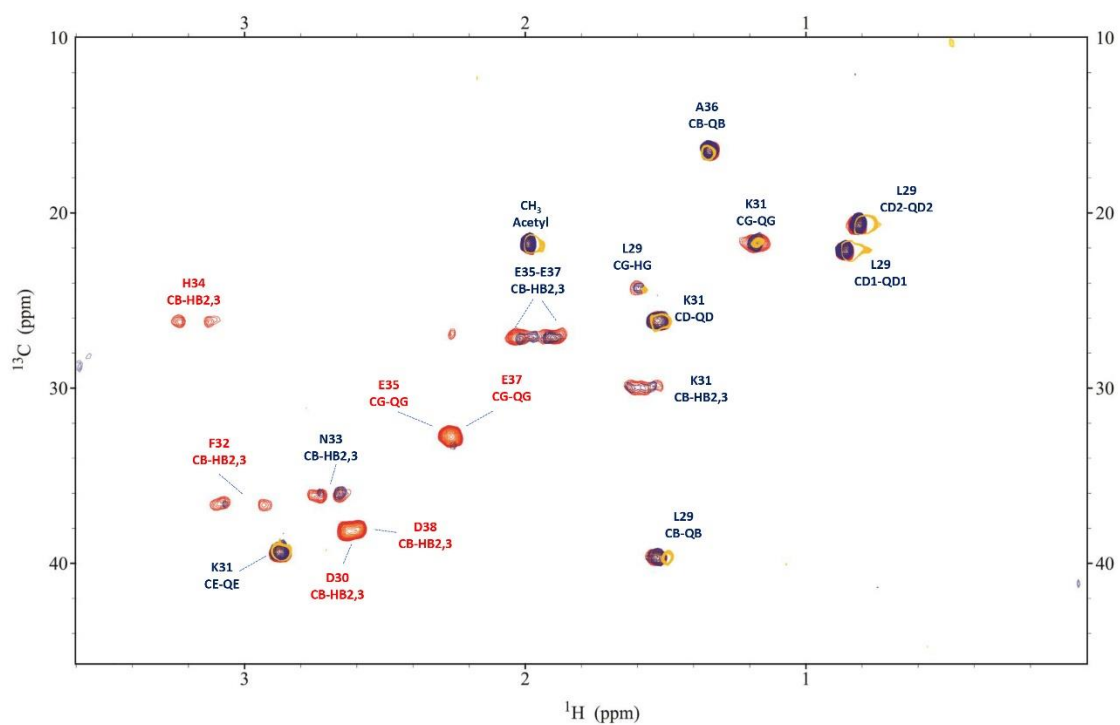

**Figure S6.** (up) Comparison of a selection aliphatic region of  $^1\text{H}$ - $^{13}\text{C}$  HSQC spectra for the free peptide P29-38 (orange) and Cu(II)-P29-38 system in the molar ratio of 0.01:1 (blue) and 0.1:1 (yellow contours) at pH 5.5.

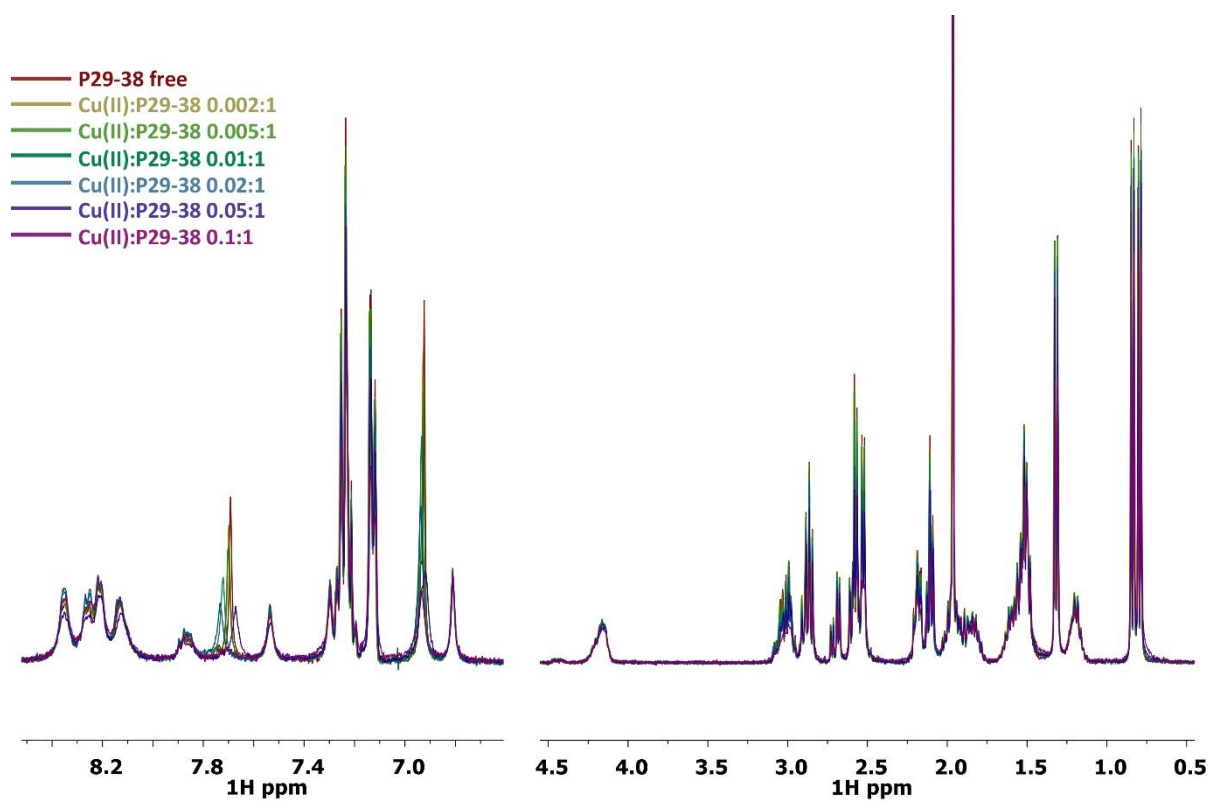

Figure S7. Comparison of  $^1\text{H}$  spectra of P29-38 with increasing addition of  $\text{Cu}^{2+}$  at pH 7.4.

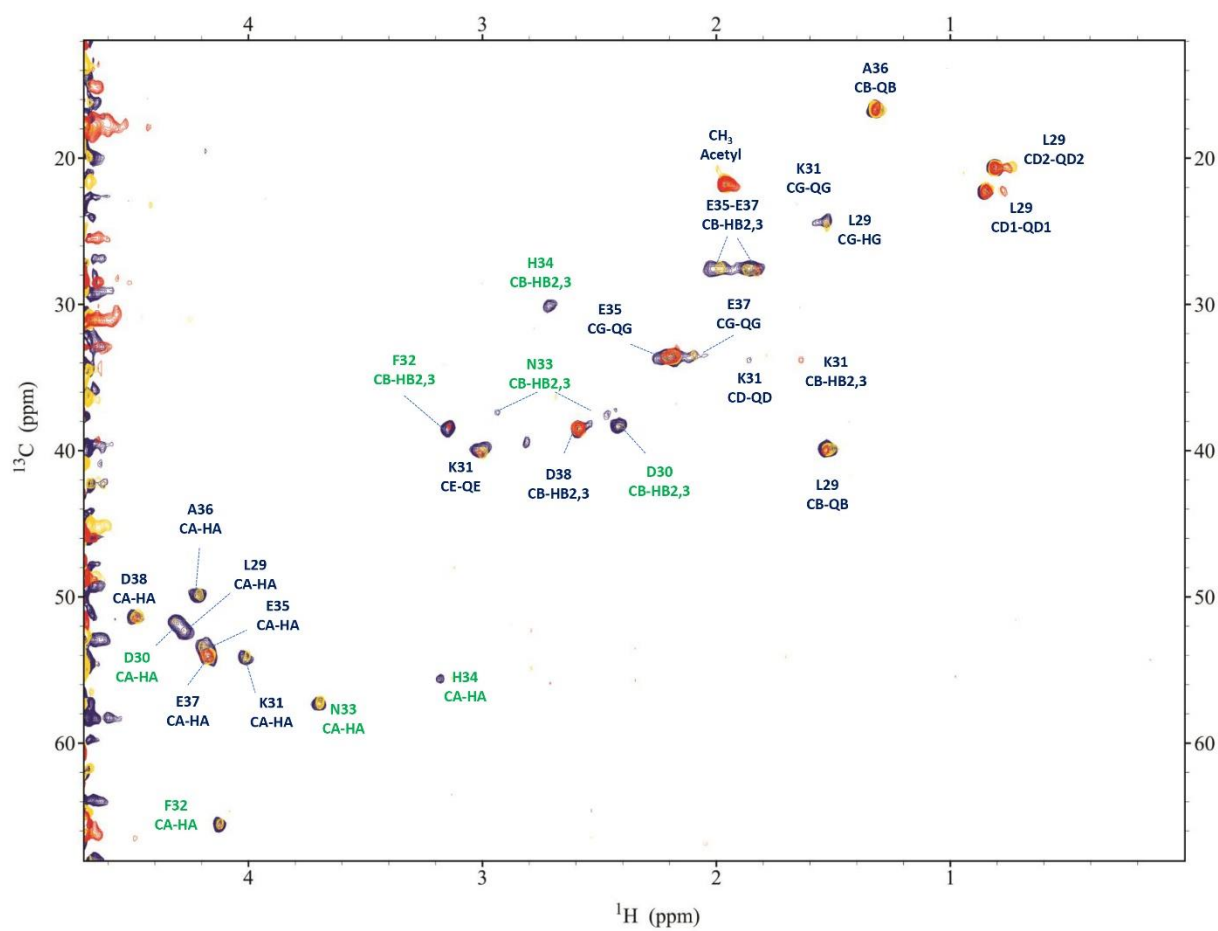

**Figure S8.** Comparison of aliphatic region of  $^1\text{H}$ - $^{13}\text{C}$  HSQC spectra for the Ni(II)-P29-38 system (blue) with the subsequent addition of 0.4 (yellow) and 0.6 (red) equivalents of Cu(II) at pH 10.6.

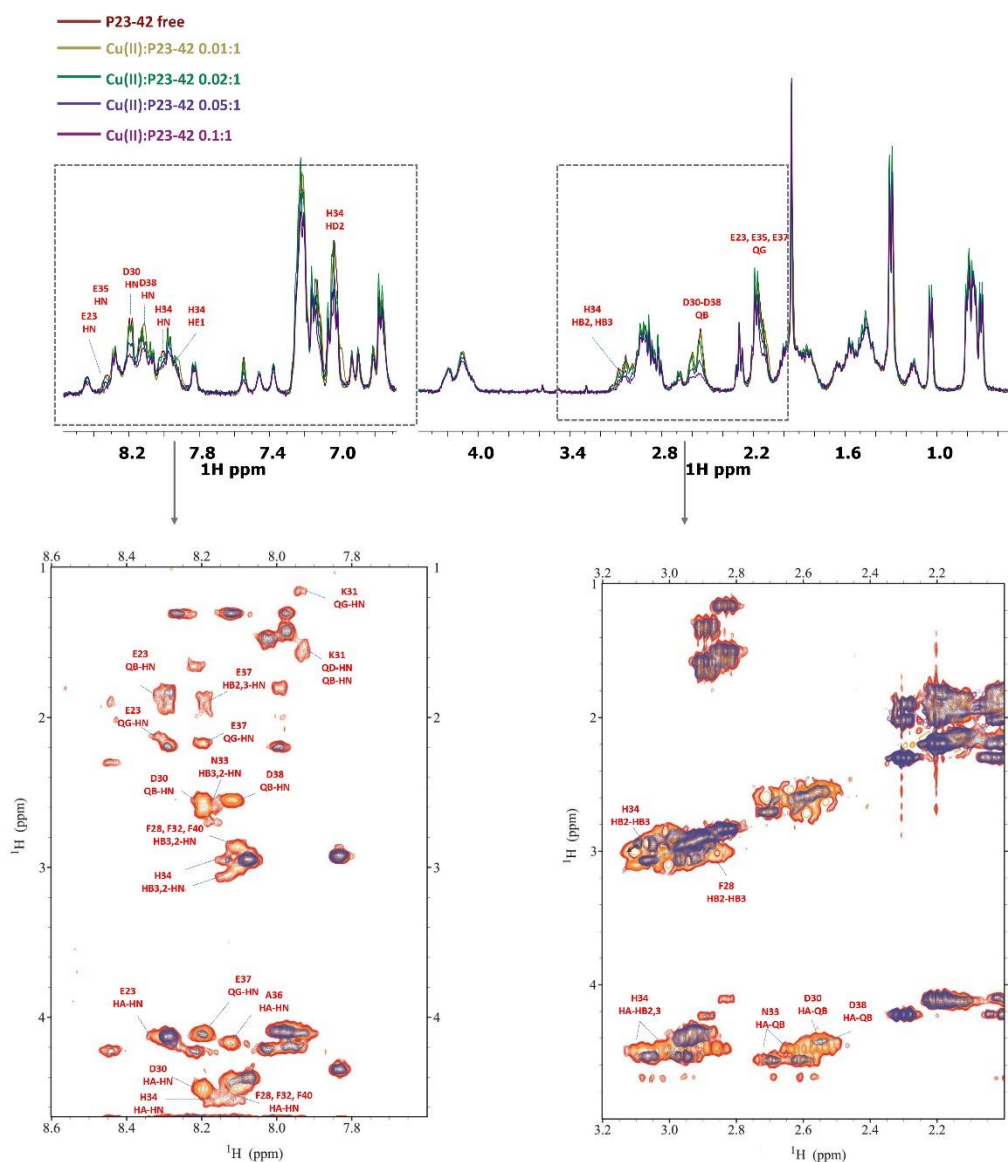

**Figure S9.** (up) Comparison of  $^1\text{H}$  spectra of P23-42 with increasing addition of  $\text{Cu}^{2+}$  at pH 7.0; (down) selection of  $^1\text{H}$ - $^1\text{H}$  TOCSY spectra for the free peptide P23-42 (orange) and  $\text{Cu(II)}$ -P23-42 system (blue), 0.1:1 molar ratio, at pH 7.0.



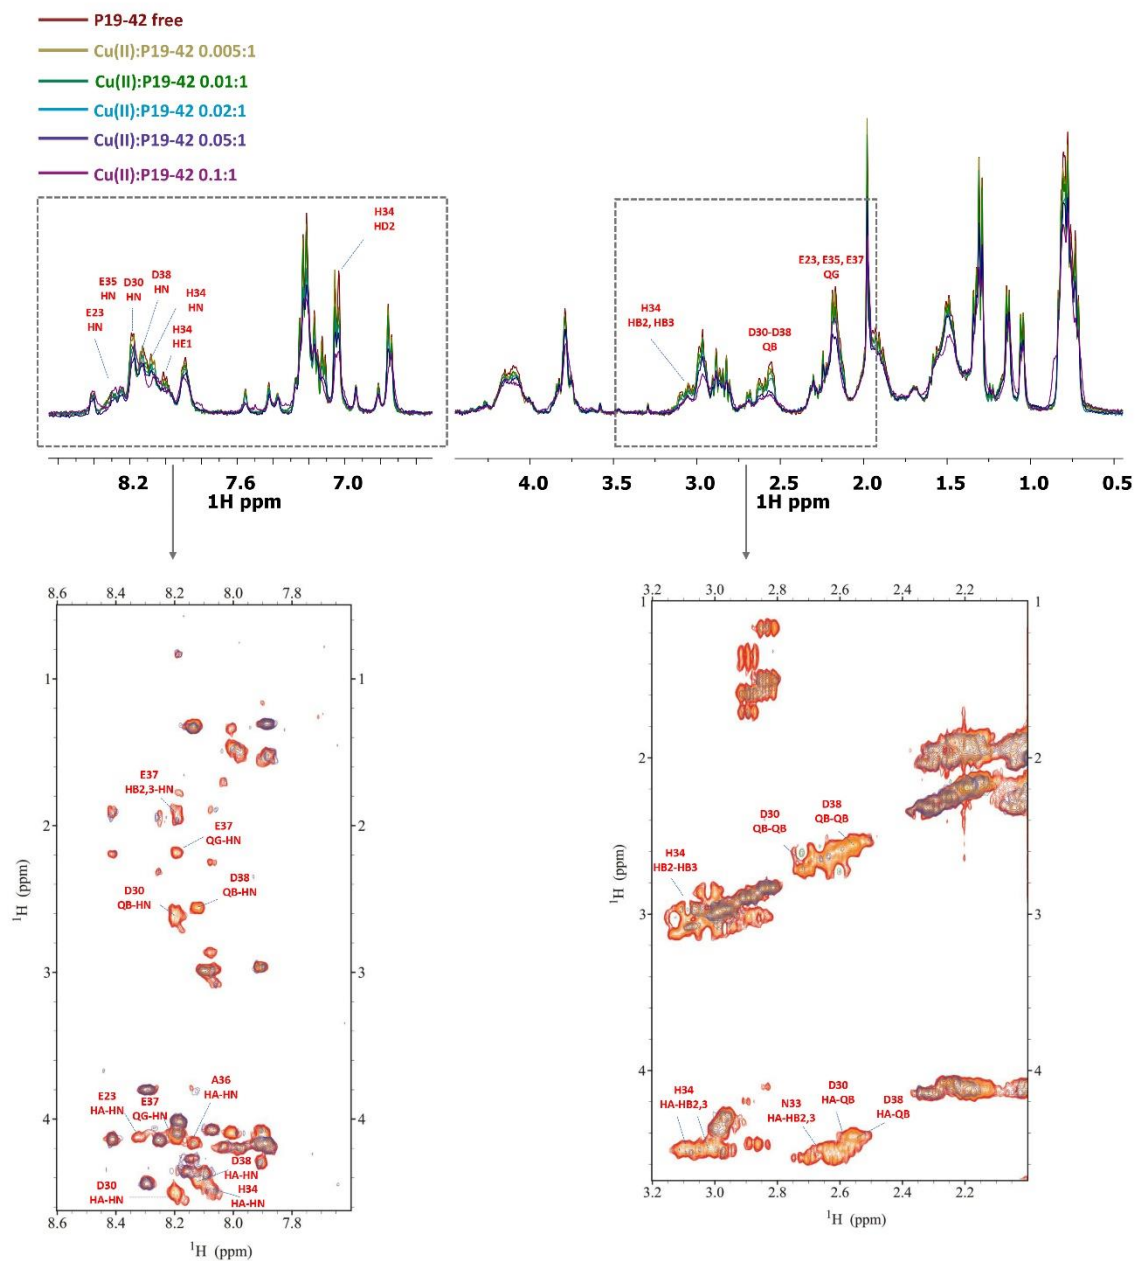

**Figure S10.** (up) Comparison of  $^1\text{H}$  spectra of P19-42 with increasing addition of  $\text{Cu}^{2+}$  at pH 7.0; (down) selection of  $^1\text{H}$ - $^1\text{H}$  TOCSY spectra for the free peptide P19-42 (orange) and  $\text{Cu(II)}\text{-P23-42}$  system (blue), 0.1:1 molar ratio, at pH 7.0.

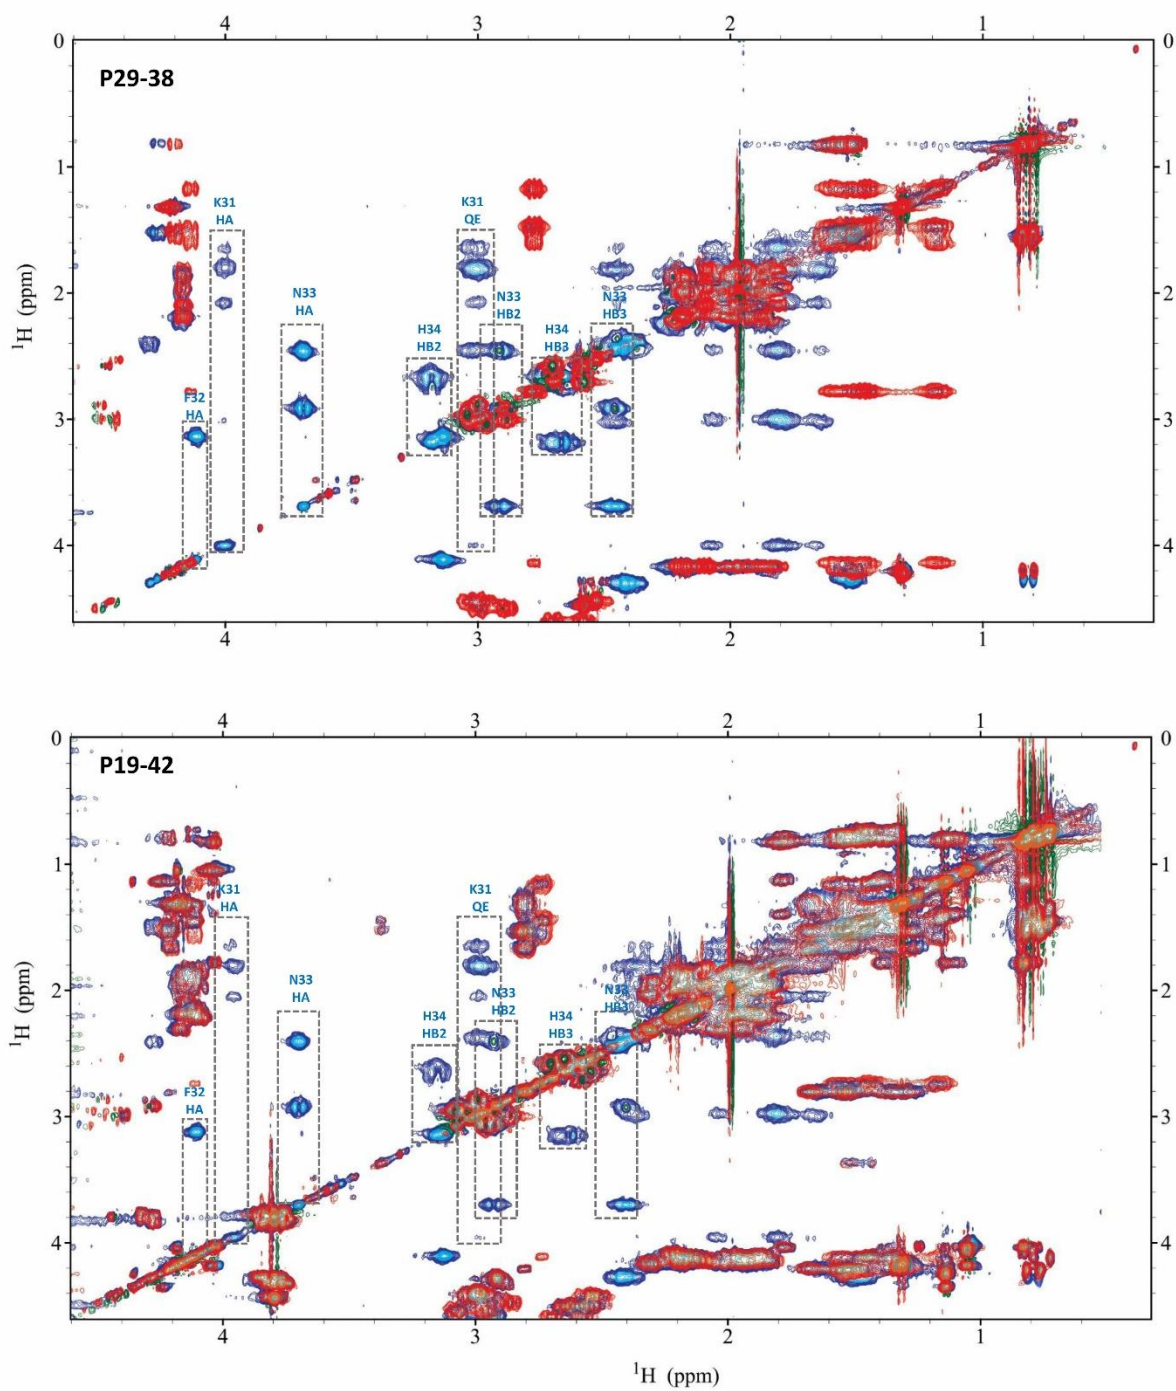

**Figure S11.** (up) Comparison of aliphatic  $^1\text{H}$ - $^1\text{H}$  TOCSY spectra for the free peptide P29-38 (red) and Ni(II)-P29-38 system (blue) and (down) for P19-42 (red) and Ni(II)-P19-42 system (blue) at pH 10.6.

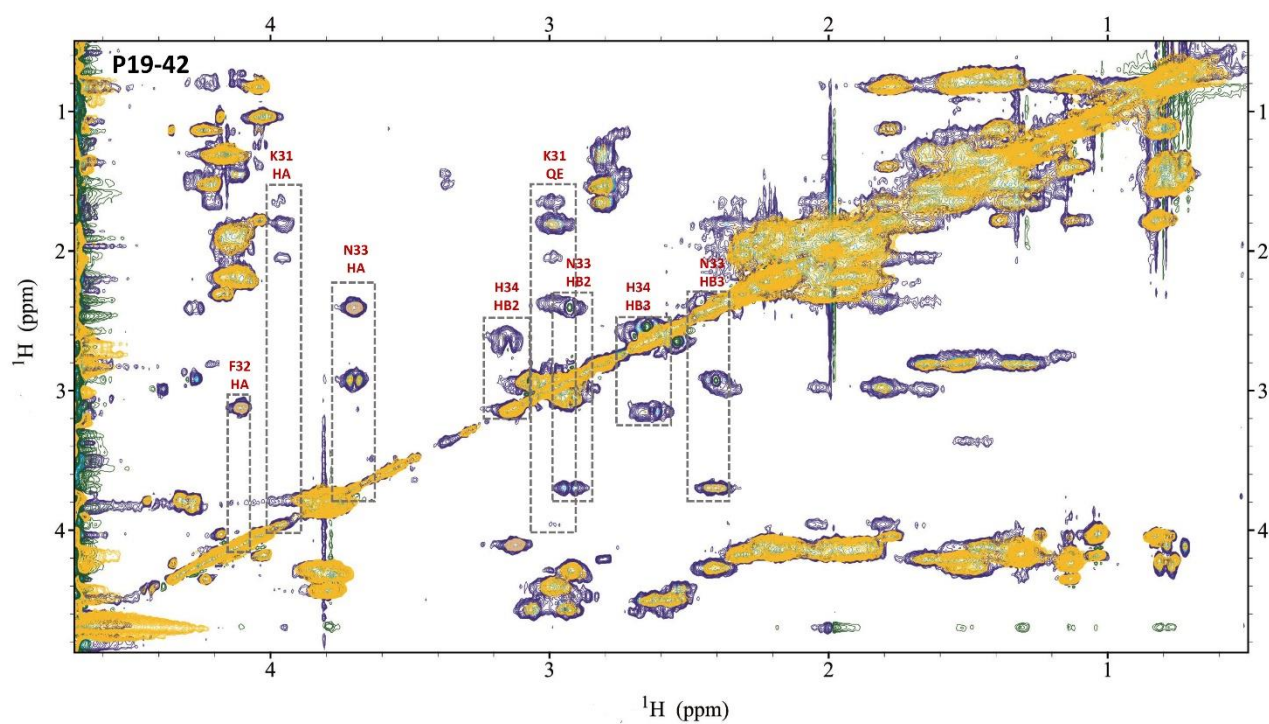

**Figure S12.** Comparison of aliphatic region of  $^1\text{H}$ - $^1\text{H}$  TOCSY spectra for the Ni(II)-P19-42 system (blue) with the addition of 0.6 equivalents of Cu(II) (yellow), at pH 10.6.
